# Supplementary material for: Does the Mother or Father Determine the Offspring Sex Ratio? Investigating the Relationship between Maternal Digit Ratio and Offspring Sex Ratio
Source: PLoS One. 2015 Nov 17;10(11):e0143054. doi: 10.1371/journal.pone.0143054 (PMC4648576; doi:10.1371/journal.pone.0143054)
Supplement: S1 Dataset — Sex: 1 = male, 2 = female; Ht, Height; Wt, Weight; BMI, Body mass index; DR, Digit ratio; S, number of sons; D, number of daughters; T, number of total offsprings; SR, offspring sex ratio. (XLS) [file pone.0143054.s001.xls]

## Sheet: Sheet1
Sex	Age	Ht	Wt	BMI	DR1	DR2	meanDR	S	D	T	SR
1	44	174	88	29.0659	0.94046	0.9262	0.93333	3	0	3	1
1	46	164	64	23.7954	0.92254	0.94048	0.93151	2	0	2	1
1	46	173	85	28.4005	0.92479	0.94187	0.93333	0	2	2	0
1	51	176	60	19.3698	1.00934	0.99066	1	1	0	1	1
1	43	164	51.5	19.1478	0.93454	0.95434	0.94444	1	0	1	1
1	55	165	67	24.6097	0.83765	0.82469	0.83117	0	2	2	0
1	57	164	65	24.1672	0.93878	0.95312	0.94595	2	0	2	1
1	59	177	79	25.2163	0.93911	0.92755	0.93333	1	1	2	0.5
1	53	181	67	20.4511	0.91176	0.9175	0.91463	0	1	1	0
1	58	170	78	26.9896	0.87616	0.88384	0.88	1	1	2	0.5
1	46	179	75	23.4075	0.93181	0.91629	0.92405	0	2	2	0
1	58	175	69	22.5306	0.91199	0.93011	0.92105	0	2	2	0
1	59	180	95	29.321	0.95567	0.96539	0.96053	0	2	2	0
1	58	173	65	21.7181	0.9384	0.95494	0.94667	2	0	2	1
1	33	163	75	28.2284	0.9483	0.96474	0.95652	1	1	2	0.5
1	59	176	69	22.2753	0.97783	0.99401	0.98592	1	1	2	0.5
1	48	166	57	20.6852	0.97782	0.96504	0.97143	0	1	1	0
1	59	163	65	24.4646	0.92593	0.93893	0.93243	0	2	2	0
1	43	169	90	31.5115	0.969	0.97694	0.97297	1	1	2	0.5
1	52	171	71	24.281	0.95159	0.96621	0.9589	1	1	2	0.5
1	39	175	83	27.102	1.01258	1.01212	1.01235	2	1	3	0.666667
1	51	173	73	24.3911	0.90976	0.89512	0.90244	1	1	2	0.5
1	40	172	60	20.2812	0.93118	0.93548	0.93333	0	2	2	0
1	47	175	78	25.4694	0.92847	0.94807	0.93827	1	0	1	1
1	59	160	60	23.4375	0.99341	0.97673	0.98507	1	1	2	0.5
1	59	160	65	25.3906	0.93844	0.92822	0.93333	0	1	1	0
1	52	169	79	27.6601	0.93321	0.94739	0.9403	1	1	2	0.5
1	54	175	78	25.4694	0.99622	1.00378	1	1	1	2	0.5
1	54	171	60	20.5191	0.92867	0.93799	0.93333	1	0	1	1
1	54	165	56	20.5693	0.94409	0.96067	0.95238	1	0	1	1
1	51	175	80	26.1224	0.98973	0.98325	0.98649	1	1	2	0.5
1	56	166	73	26.4915	0.94834	0.93226	0.9403	2	0	2	1
1	56	175	60	19.5918	0.9376	0.9543	0.94595	1	2	3	0.333333
1	55	160	63	24.6094	0.96594	0.98142	0.97368	2	0	2	1
1	48	178	85	26.8274	0.99657	0.97711	0.98684	1	2	3	0.333333
1	44	164	68	25.2826	1.01629	1.01229	1.01429	1	3	4	0.25
1	59	167	67	24.0238	0.95525	0.97067	0.96296	1	2	3	0.333333
1	54	175	75	24.4898	0.95301	0.94443	0.94872	1	0	1	1
1	51	175	85	27.7551	0.84671	0.85995	0.85333	1	1	2	0.5
1	59	165	71	26.079	0.93642	0.95246	0.94444	4	2	6	0.666667
1	58	163	62	23.3355	0.95022	0.96758	0.9589	2	0	2	1
1	47	164	58	21.5645	0.91886	0.91212	0.91549	0	2	2	0
1	57	168	77	27.2817	0.96309	0.95241	0.95775	1	0	1	1
1	53	165	62	22.7732	0.9912	0.98214	0.98667	2	0	2	1
1	44	163	70	26.3465	0.93465	0.94595	0.9403	0	1	1	0
1	48	176	76	24.5351	0.96901	0.95407	0.96154	2	0	2	1
1	54	172	68	22.9854	0.92654	0.9113	0.91892	1	1	2	0.5
1	44	167	88	31.5537	0.95092	0.96574	0.95833	1	1	2	0.5
1	46	160	60	23.4375	0.98742	0.98228	0.98485	2	0	2	1
1	37	177	90	28.7274	0.9698	0.98142	0.97561	0	2	2	0
1	46	170	80	27.6817	0.96383	0.95397	0.9589	2	0	2	1
1	48	178	75	23.6713	0.91655	0.92555	0.92105	1	1	2	0.5
1	58	180	80	24.6914	0.93464	0.92078	0.92771	1	1	2	0.5
1	39	180	91	28.0864	0.93434	0.94662	0.94048	0	2	2	0
1	47	172	69	23.3234	0.95564	0.9391	0.94737	2	0	2	1
1	49	170	70	24.2215	0.93996	0.9267	0.93333	0	3	3	0
1	54	164	54.8	20.3748	0.96199	0.95907	0.96053	1	2	3	0.333333
1	51	168	78	27.6361	0.98104	0.96262	0.97183	1	1	2	0.5
1	58	164	62	23.0518	0.89496	0.87646	0.88571	2	0	2	1
1	58	176	76	24.5351	0.91859	0.92951	0.92405	1	0	1	1
1	33	172	80	27.0416	0.92161	0.92049	0.92105	0	1	1	0
1	37	183	78	23.2912	0.96901	0.95407	0.96154	2	0	2	1
1	48	176	70	22.5981	0.97407	0.97715	0.97561	1	0	1	1
1	59	177	65	20.7476	0.97931	0.96805	0.97368	2	0	2	1
1	46	179	62	19.3502	0.93866	0.95022	0.94444	1	1	2	0.5
1	44	172	74	25.0135	0.96216	0.9545	0.95833	1	1	2	0.5
1	57	162	63	24.0055	0.95073	0.94537	0.94805	1	2	3	0.333333
1	41	171	73	24.9649	0.95167	0.96833	0.96	2	1	3	0.666667
1	52	172	68	22.9854	0.95228	0.96552	0.9589	0	2	2	0
1	59	170	60	20.7612	0.97865	0.96871	0.97368	1	1	2	0.5
1	53	177	80	25.5354	0.95434	0.96566	0.96	2	0	2	1
1	48	170	54.4	18.8235	0.92423	0.94243	0.93333	1	0	1	1
1	55	167	105	37.6493	0.92384	0.9095	0.91667	1	1	2	0.5
1	59	179	90	28.089	0.98105	0.97017	0.97561	2	0	2	1
1	53	165	72	26.4463	0.96638	0.97806	0.97222	0	2	2	0
1	56	163	61	22.9591	0.96967	0.95625	0.96296	2	0	2	1
1	49	173	77	25.7276	0.92465	0.93837	0.93151	2	0	2	1
1	37	166	66	23.9512	0.9367	0.95218	0.94444	1	1	2	0.5
1	54	168	53	18.7783	0.95273	0.93769	0.94521	2	0	2	1
1	55	177	63	20.1092	0.96479	0.95187	0.95833	1	0	1	1
1	53	165	67	24.6097	1.00173	0.99827	1	1	1	2	0.5
1	49	165	69	25.3444	0.96319	0.97967	0.97143	1	0	1	1
1	58	170	68	23.5294	0.95142	0.96408	0.95775	1	1	2	0.5
1	57	161	56	21.6041	0.92502	0.90832	0.91667	2	0	2	1
1	43	175	69	22.5306	0.96355	0.95425	0.9589	1	1	2	0.5
1	51	180	95	29.321	0.96535	0.97667	0.97101	0	2	2	0
1	53	180	80	24.6914	0.95504	0.94496	0.95	1	0	1	1
1	53	164	54	20.0773	1.0391	1.0532	1.04615	2	0	2	1
1	56	166	64	23.2254	0.89578	0.91244	0.90411	1	2	3	0.333333
1	48	174	68	22.46	0.98217	0.96589	0.97403	0	2	2	0
1	53	174	71	23.4509	0.95113	0.94221	0.94667	1	1	2	0.5
1	54	178	72	22.7244	0.93992	0.95482	0.94737	1	1	2	0.5
1	58	172	65	21.9713	0.95261	0.93627	0.94444	1	1	2	0.5
1	50	174	73	24.1115	0.93162	0.93504	0.93333	1	1	2	0.5
1	56	160	65	25.3906	0.9526	0.93782	0.94521	2	0	2	1
1	56	163	60	22.5827	0.90999	0.92785	0.91892	1	1	2	0.5
1	59	176	85	27.4406	0.95662	0.93672	0.94667	1	1	2	0.5
1	52	171	73	24.9649	0.95488	0.96918	0.96203	1	0	1	1
1	51	170	75	25.9516	0.95447	0.94027	0.94737	2	0	2	1
1	53	167	71	25.4581	0.92296	0.9362	0.92958	1	0	1	1
1	47	172	64	21.6333	0.95118	0.96662	0.9589	1	1	2	0.5
1	52	175	72	23.5102	0.99298	1.00702	1	1	1	2	0.5
1	57	160	52	20.3125	0.93134	0.94366	0.9375	1	0	1	1
1	45	175	83	27.102	0.92469	0.94197	0.93333	0	2	2	0
1	38	173	70	23.3887	0.96525	0.97919	0.97222	0	1	1	0
1	53	172	73	24.6755	0.9269	0.93796	0.93243	0	2	2	0
1	48	176	86	27.7634	0.91931	0.92685	0.92308	0	1	1	0
1	45	175	75	24.4898	0.91441	0.90837	0.91139	1	0	1	1
1	54	170	76	26.2976	0.97568	0.96372	0.9697	1	2	3	0.333333
1	36	175	61	19.9184	0.93824	0.92288	0.93056	1	0	1	1
1	54	177	84	26.8122	0.96744	0.95756	0.9625	1	1	2	0.5
1	56	180	78	24.0741	0.88178	0.86822	0.875	2	0	2	1
1	40	178	65	20.5151	0.92985	0.93681	0.93333	1	1	2	0.5
1	52	165	88	32.3232	0.96477	0.97369	0.96923	2	1	3	0.666667
1	57	170	70	24.2215	0.9332	0.93776	0.93548	0	2	2	0
1	53	171	83	28.3848	0.95364	0.96302	0.95833	0	1	1	0
1	52	160	63	24.6094	0.9629	0.97996	0.97143	1	2	3	0.333333
1	39	164	65	24.1672	0.91387	0.92823	0.92105	0	2	2	0
1	53	168	78	27.6361	0.95703	0.94041	0.94872	1	0	1	1
1	42	172	72	24.3375	0.91694	0.92516	0.92105	1	0	1	1
1	38	177	102	32.5577	0.92334	0.93032	0.92683	0	2	2	0
1	58	173	67	22.3863	0.84749	0.85917	0.85333	1	1	2	0.5
1	42	178	62	19.5682	0.95222	0.93968	0.94595	2	0	2	1
1	57	168	71	25.1559	0.97806	0.9686	0.97333	0	3	3	0
1	52	169	61	21.3578	0.94004	0.9533	0.94667	2	0	2	1
1	40	168	63	22.3214	0.91449	0.90603	0.91026	1	1	2	0.5
1	44	180	84	25.9259	0.90673	0.92253	0.91463	1	1	2	0.5
1	31	178	85	26.8274	0.94591	0.95153	0.94872	0	1	1	0
1	52	170	60	20.7612	0.91838	0.8998	0.90909	1	1	2	0.5
1	56	167	72	25.8166	0.93028	0.91182	0.92105	2	1	3	0.666667
1	58	169	71	24.8591	0.97544	0.96486	0.97015	2	0	2	1
1	39	170	90	31.1419	0.93334	0.92968	0.93151	2	0	2	1
1	59	165	70	25.7117	0.89315	0.89905	0.8961	1	1	2	0.5
1	52	174	73	24.1115	0.93553	0.92363	0.92958	1	1	2	0.5
1	55	168	63	22.3214	0.9497	0.93602	0.94286	2	0	2	1
1	48	179	79	24.6559	0.96328	0.95672	0.96	1	1	2	0.5
1	58	160	55	21.4844	0.92855	0.94487	0.93671	1	1	2	0.5
1	44	176	73	23.5666	0.92387	0.93915	0.93151	1	0	1	1
1	56	173	83	27.7323	0.95381	0.96725	0.96053	0	2	2	0
1	50	172	72	24.3375	0.97642	0.96644	0.97143	1	0	1	1
1	45	176	75	24.2123	0.91826	0.9336	0.92593	1	1	2	0.5
1	43	178	80	25.2493	0.95731	0.96861	0.96296	0	2	2	0
1	51	172	78	26.3656	0.96242	0.97788	0.97015	2	0	2	1
1	49	165	65	23.8751	0.96348	0.97854	0.97101	0	1	1	0
1	47	169	68	23.8087	0.96975	0.95333	0.96154	3	0	3	1
1	50	168	60	21.2585	0.91797	0.93013	0.92405	1	2	3	0.333333
1	38	174	55	18.1662	0.96706	0.95074	0.9589	1	1	2	0.5
1	52	169	67	23.4586	0.96842	0.95564	0.96203	1	0	1	1
1	54	160	68	26.5625	0.96715	0.95177	0.95946	2	0	2	1
1	56	162	63	24.0055	0.94819	0.96357	0.95588	2	0	2	1
1	46	169	88	30.8112	0.95526	0.96682	0.96104	1	1	2	0.5
1	58	164	58	21.5645	0.95159	0.96621	0.9589	2	0	2	1
1	53	173	60	20.0474	0.97654	0.96192	0.96923	0	2	2	0
1	45	172	75	25.3515	0.93288	0.93554	0.93421	2	0	2	1
1	41	177	75	23.9395	0.93949	0.92893	0.93421	1	0	1	1
1	49	170	79	27.3356	0.97727	0.96023	0.96875	1	0	1	1
1	36	175	80	26.1224	0.93645	0.92069	0.92857	0	1	1	0
1	54	174	53	17.5056	0.95467	0.94007	0.94737	0	2	2	0
1	40	178	76	23.9869	0.92564	0.94278	0.93421	1	2	3	0.333333
1	56	178	58	18.3058	0.96516	0.9822	0.97368	1	1	2	0.5
1	39	160	65	25.3906	0.9367	0.95218	0.94444	1	1	2	0.5
1	55	169	75	26.2596	0.91792	0.92824	0.92308	0	2	2	0
1	58	165	73	26.8136	0.95475	0.96833	0.96154	1	1	2	0.5
1	51	168	70	24.8016	0.95986	0.94784	0.95385	0	1	1	0
1	58	169	89	31.1614	0.9234	0.91444	0.91892	1	1	2	0.5
1	58	164	60	22.3081	0.94082	0.92584	0.93333	1	2	3	0.333333
1	51	170	60	20.7612	0.99298	1.00702	1	1	1	2	0.5
1	55	170	78	26.9896	0.9382	0.92846	0.93333	0	2	2	0
1	52	167	66	23.6652	0.96203	0.95347	0.95775	0	1	1	0
1	51	167	55	19.721	0.95362	0.96744	0.96053	1	0	1	1
1	59	167	63	22.5896	0.91551	0.92865	0.92208	1	1	2	0.5
1	50	175	73	23.8367	0.93935	0.94953	0.94444	2	0	2	1
1	53	173	72	24.0569	0.90345	0.91933	0.91139	1	1	2	0.5
1	46	165	60	22.0386	0.94193	0.92473	0.93333	1	1	2	0.5
1	51	174	69	22.7903	0.95337	0.93853	0.94595	1	0	1	1
1	52	164	61	22.68	0.93988	0.92678	0.93333	2	0	2	1
1	54	175	62	20.2449	0.95337	0.93997	0.94667	1	1	2	0.5
1	50	156	81	33.284	0.99341	0.97801	0.98571	2	0	2	1
1	43	170	61	21.1073	0.89802	0.90754	0.90278	0	2	2	0
1	50	176	86	27.7634	0.99369	0.97773	0.98571	1	0	1	1
1	57	168	71	25.1559	0.90597	0.91221	0.90909	1	2	3	0.333333
1	59	162	60	22.8624	0.91628	0.92988	0.92308	1	1	2	0.5
1	59	170	75	25.9516	0.96303	0.96005	0.96154	0	1	1	0
1	34	168	62	21.9671	0.90433	0.89055	0.89744	1	0	1	1
1	52	167	58	20.7967	0.9373	0.92572	0.93151	1	1	2	0.5
1	38	180	98	30.2469	0.99624	1.00376	1	1	1	2	0.5
1	53	168.5	66	23.2458	0.93038	0.93628	0.93333	1	1	2	0.5
1	57	183	82	24.4857	0.94315	0.93185	0.9375	1	1	2	0.5
1	54	163	60	22.5827	0.98101	0.96343	0.97222	0	2	2	0
1	53	171	81	27.7008	1.01419	1.01321	1.0137	1	1	2	0.5
1	59	179	78	24.3438	0.91779	0.92837	0.92308	2	0	2	1
1	43	172	85	28.7317	0.94051	0.92251	0.93151	2	1	3	0.666667
1	51	167	82	29.4023	0.93772	0.95116	0.94444	0	2	2	0
1	47	171	63	21.5451	0.9272	0.91896	0.92308	1	1	2	0.5
1	32	168	68	24.093	0.92552	0.94114	0.93333	1	0	1	1
1	38	170	68	23.5294	0.97968	0.96768	0.97368	0	2	2	0
1	45	179	64	19.9744	0.96219	0.96463	0.96341	1	0	1	1
1	43	180	84	25.9259	0.88358	0.89142	0.8875	1	1	2	0.5
1	33	178	93	29.3524	0.98022	0.96422	0.97222	1	0	1	1
1	51	175.1	85	27.7234	0.96484	0.97634	0.97059	1	1	2	0.5
1	54	167	59	21.1553	0.96769	0.97675	0.97222	0	1	1	0
1	31	168	60	21.2585	0.94599	0.94289	0.94444	0	1	1	0
1	42	172	85	28.7317	0.97588	0.96614	0.97101	1	1	2	0.5
1	56	175	70	22.8571	0.95223	0.96669	0.95946	2	0	2	1
1	56	164	69	25.6544	0.96816	0.95492	0.96154	1	1	2	0.5
1	59	179	80	24.968	0.87553	0.88057	0.87805	1	1	2	0.5
1	54	161	55	21.2183	0.94904	0.94286	0.94595	1	1	2	0.5
1	53	175	50	16.3265	0.94502	0.92998	0.9375	1	0	1	1
1	54	161	68	26.2336	0.93519	0.95369	0.94444	0	2	2	0
1	51	175	60	19.5918	0.97992	0.9923	0.98611	3	0	3	1
1	48	161	66	25.462	0.95364	0.93826	0.94595	2	0	2	1
1	51	170	67	23.1834	0.91871	0.91227	0.91549	1	2	3	0.333333
1	45	165	72	26.4463	0.96953	0.97491	0.97222	1	0	1	1
1	56	171	71	24.281	0.9386	0.92982	0.93421	1	2	3	0.333333
1	47	171	76	25.9909	0.95362	0.96744	0.96053	1	0	1	1
1	56	175	70	22.8571	0.95074	0.94116	0.94595	0	2	2	0
1	56	178	76	23.9869	0.97667	0.96927	0.97297	1	1	2	0.5
1	59	160	50	19.5312	0.94394	0.96082	0.95238	1	1	2	0.5
1	56	170	82	28.3737	0.96298	0.98146	0.97222	2	3	5	0.4
1	41	170	88	30.4498	0.98021	0.99201	0.98611	0	1	1	0
1	40	184	75	22.1526	0.92086	0.9328	0.92683	1	1	2	0.5
1	40	179	84	26.2164	0.98153	0.96583	0.97368	0	1	1	0
1	58	164	54	20.0773	0.86236	0.84816	0.85526	1	1	2	0.5
1	58	170	58	20.0692	0.92966	0.91244	0.92105	1	1	2	0.5
1	53	159	57	22.5466	0.89274	0.87942	0.88608	1	0	1	1
1	48	176	61	19.6927	0.96582	0.95918	0.9625	0	1	1	0
1	46	170	63	21.7993	0.93926	0.93086	0.93506	1	1	2	0.5
1	42	174	62	20.4783	0.8971	0.91372	0.90541	0	2	2	0
1	33	178	70	22.0932	0.99874	1.00126	1	1	1	2	0.5
1	42	162	73	27.8159	0.91448	0.93168	0.92308	1	1	2	0.5
1	40	180	78	24.0741	0.92536	0.91674	0.92105	1	1	2	0.5
1	54	169	68	23.8087	0.92368	0.94298	0.93333	1	1	2	0.5
1	31	177	68	21.7051	0.92571	0.91639	0.92105	1	0	1	1
1	35	173	68	22.7204	0.9318	0.9163	0.92405	0	1	1	0
1	59	163	69	25.9701	0.96569	0.94735	0.95652	1	1	2	0.5
1	48	167	58	20.7967	0.9328	0.9422	0.9375	0	2	2	0
1	55	170	70	24.2215	0.96629	0.98243	0.97436	1	0	1	1
1	58	160	53	20.7031	0.95379	0.96287	0.95833	0	2	2	0
1	59	165	62	22.7732	0.96679	0.95427	0.96053	1	1	2	0.5
1	56	158	50	20.0288	0.95096	0.9538	0.95238	1	1	2	0.5
1	59	175	68	22.2041	0.91049	0.92083	0.91566	1	1	2	0.5
1	53	170	63	21.7993	0.9784	0.99302	0.98571	1	0	1	1
1	35	168	75	26.5731	0.93824	0.92288	0.93056	1	0	1	1
1	56	170	65	22.4913	1.05201	1.06921	1.06061	1	1	2	0.5
1	41	170	55	19.0311	0.90068	0.91266	0.90667	1	1	2	0.5
1	49	174	72	23.7812	0.97733	0.96787	0.9726	1	1	2	0.5
1	58	174	70	23.1206	0.95769	0.94475	0.95122	2	0	2	1
1	54	168	65	23.03	0.94742	0.96434	0.95588	1	2	3	0.333333
1	59	183	81	24.187	0.91124	0.9021	0.90667	0	2	2	0
1	50	167	75	26.8923	0.96614	0.98052	0.97333	2	0	2	1
1	56	165	68	24.977	0.92193	0.93723	0.92958	1	0	1	1
1	38	168	73	25.8645	1.00588	0.99412	1	1	0	1	1
1	54	174	68	22.46	0.94061	0.95129	0.94595	1	1	2	0.5
1	36	182	92	27.7744	0.96769	0.97897	0.97333	2	0	2	1
1	58	170	80	27.6817	0.95297	0.94447	0.94872	0	2	2	0
1	49	161	62	23.9188	0.98462	0.99142	0.98802	1	1	2	0.5
1	43	170	80	27.6817	0.92667	0.91117	0.91892	0	1	1	0
2	51	161	57	21.9899	0.89251	0.88213	0.88732	1	2	3	0.333333
2	53	153	51	21.7865	0.92739	0.90867	0.91803	1	1	2	0.5
2	51	156	59	24.2439	0.90744	0.9304	0.91892	1	0	1	1
2	40	163	50	18.8189	0.92068	0.93646	0.92857	0	1	1	0
2	59	154	64	26.986	0.94089	0.92577	0.93333	2	0	2	1
2	57	162	56.5	21.5287	0.96461	0.97741	0.97101	1	4	5	0.2
2	47	158	50	20.0288	0.94404	0.94786	0.94595	1	1	2	0.5
2	48	150	68	30.2222	0.9108	0.89742	0.90411	2	0	2	1
2	53	163	59	22.2063	0.97993	0.99229	0.98611	2	0	2	1
2	52	156	70	28.764	0.96141	0.94629	0.95385	0	2	2	0
2	52	154	61	25.721	0.92374	0.90484	0.91429	1	1	2	0.5
2	54	150	34	15.1111	0.88625	0.89837	0.89231	2	0	2	1
2	51	163	50	18.8189	1.03044	1.03206	1.03125	0	2	2	0
2	58	153	70	29.903	0.92467	0.92827	0.92647	0	2	2	0
2	54	150	54	24	0.99747	1.00253	1	1	2	3	0.333333
2	49	153	56	23.9224	0.93593	0.91701	0.92647	1	1	2	0.5
2	57	153	58	24.7768	0.94532	0.9316	0.93846	0	2	2	0
2	50	157	54	21.9076	0.91778	0.9373	0.92754	1	1	2	0.5
2	59	160	61	23.8281	0.98094	0.96192	0.97143	1	1	2	0.5
2	58	153	58	24.7768	0.87383	0.89087	0.88235	1	1	2	0.5
2	49	165	60	22.0386	0.94808	0.9662	0.95714	1	1	2	0.5
2	50	154	56	23.6128	0.91594	0.9348	0.92537	0	2	2	0
2	44	150	55	24.4444	0.90687	0.90563	0.90625	1	1	2	0.5
2	55	160	76.5	29.8828	0.94025	0.92817	0.93421	1	1	2	0.5
2	50	154	61.2	25.8054	1.12727	1.11889	1.12308	0	1	1	0
2	42	166	55	19.9594	0.95119	0.95791	0.95455	1	1	2	0.5
2	49	159	48	18.9866	0.9322	0.92696	0.92958	1	1	2	0.5
2	54	153	68	29.0487	0.94962	0.96342	0.95652	0	2	2	0
2	47	168	77	27.2817	0.93818	0.95224	0.94521	1	1	2	0.5
2	58	168	57	20.1956	0.94598	0.93808	0.94203	1	0	1	1
2	51	153	53	22.6409	0.96331	0.97955	0.97143	1	1	2	0.5
2	52	153	51	21.7865	0.93136	0.92158	0.92647	1	1	2	0.5
2	52	155	56	23.3091	0.92148	0.9336	0.92754	1	1	2	0.5
2	51	159	61	24.1288	0.93977	0.95213	0.94595	1	1	2	0.5
2	50	163	70	26.3465	0.99044	0.97926	0.98485	1	1	2	0.5
2	42	150	56	24.8889	0.96516	0.9733	0.96923	1	1	2	0.5
2	59	156	60	24.6548	0.9485	0.967	0.95775	2	2	4	0.5
2	57	153	61	26.0584	0.95115	0.96313	0.95714	2	0	2	1
2	50	161	58	22.3757	0.97935	0.99207	0.98571	1	1	2	0.5
2	49	160	61	23.8281	0.92704	0.94138	0.93421	3	0	3	1
2	50	163	48	18.0662	0.99669	1.00331	1	2	3	5	0.4
2	52	162	60	22.8624	1.04049	1.04285	1.04167	1	1	2	0.5
2	57	151	42	18.4202	0.96006	0.97744	0.96875	1	1	2	0.5
2	57	148	52	23.74	0.95274	0.96276	0.95775	2	1	3	0.666667
2	52	148	53	24.1965	0.96141	0.97889	0.97015	0	3	3	0
2	55	155	46	19.1467	0.92874	0.90996	0.91935	1	1	2	0.5
2	49	147	55	25.4524	0.95753	0.94723	0.95238	1	1	2	0.5
2	53	153	56	23.9224	0.97422	0.96864	0.97143	1	1	2	0.5
2	51	161	54	20.8325	0.92475	0.92141	0.92308	1	1	2	0.5
2	53	157	67	27.1816	0.94965	0.95805	0.95385	1	1	2	0.5
2	55	158	63	25.2363	0.97722	0.96218	0.9697	1	1	2	0.5
2	51	161	70	27.0051	0.9758	0.96864	0.97222	1	1	2	0.5
2	50	156	48	19.7239	0.89776	0.9078	0.90278	1	2	3	0.333333
2	53	154	55	23.1911	1.11901	1.12715	1.12308	1	1	2	0.5
2	52	149	46	20.7198	0.93593	0.94643	0.94118	0	1	1	0
2	59	159	53	20.9644	0.98151	0.96293	0.97222	1	2	3	0.333333
2	55	152	56	24.2382	0.99367	0.98001	0.98684	0	3	3	0
2	53	161	62	23.9188	0.90172	0.91646	0.90909	1	0	1	1
2	56	157	69	27.993	0.93357	0.94521	0.93939	2	0	2	1
2	43	165	61	22.4059	0.94511	0.93549	0.9403	1	1	2	0.5
2	54	158	66	26.4381	0.95528	0.96578	0.96053	1	1	2	0.5
2	46	163	60	22.5827	0.96304	0.97982	0.97143	0	1	1	0
2	43	155	65	27.0552	0.90687	0.92171	0.91429	2	0	2	1
2	49	162	55	20.9572	0.88829	0.90659	0.89744	1	1	2	0.5
2	48	157	56	22.719	0.90745	0.89537	0.90141	1	0	1	1
2	59	153	54	23.0681	0.93505	0.94555	0.9403	2	0	2	1
2	56	150	52.8	23.4667	0.96018	0.94146	0.95082	1	1	2	0.5
2	52	158	68	27.2392	0.94734	0.93326	0.9403	1	1	2	0.5
2	52	157	53	21.5019	0.9809	0.99052	0.98571	2	0	2	1
2	53	157	58	23.5304	0.94977	0.94065	0.94521	1	1	2	0.5
2	44	162	67	25.5296	0.9332	0.94558	0.93939	2	0	2	1
2	51	157	57	23.1247	0.93503	0.92211	0.92857	1	0	1	1
2	47	164	55	20.4491	0.90027	0.89077	0.89552	0	1	1	0
2	52	163	70	26.3465	0.96945	0.97927	0.97436	5	0	5	1
2	43	158	58	23.2335	0.91049	0.90033	0.90541	0	1	1	0
2	56	150	59	26.2222	0.93282	0.91792	0.92537	1	0	1	1
2	49	160	52	20.3125	0.97679	0.96351	0.97015	2	0	2	1
2	56	154	54	22.7694	0.97994	0.9645	0.97222	2	0	2	1
2	59	152	49	21.2084	0.91619	0.91479	0.91549	1	1	2	0.5
2	48	146	51	23.9257	0.95708	0.97626	0.96667	2	1	3	0.666667
2	49	168	78	27.6361	0.96896	0.94884	0.9589	1	1	2	0.5
2	56	154	61	25.721	0.96827	0.97375	0.97101	0	3	3	0
2	53	156	45	18.4911	0.98873	0.98229	0.98551	0	2	2	0
2	52	160	64	25	0.94968	0.94222	0.94595	1	4	5	0.2
2	58	158	60	24.0346	0.91757	0.91341	0.91549	1	1	2	0.5
2	59	158	68	27.2392	0.93935	0.95399	0.94667	1	1	2	0.5
2	55	159	60	23.7332	0.94128	0.95482	0.94805	3	0	3	1
2	54	157	54	21.9076	0.97924	0.96278	0.97101	1	1	2	0.5
2	54	150	62	27.5556	0.93608	0.93058	0.93333	1	1	2	0.5
2	47	148	52	23.74	0.96749	0.97191	0.9697	1	1	2	0.5
2	58	150	62	27.5556	0.92368	0.93346	0.92857	1	2	3	0.333333
2	55	158	45	18.026	0.96692	0.97752	0.97222	0	2	2	0
2	53	159	57	22.5466	0.929	0.91716	0.92308	2	0	2	1
2	50	158	54	21.6311	0.87363	0.85971	0.86667	1	1	2	0.5
2	54	150	52	23.1111	0.93131	0.91485	0.92308	2	0	2	1
2	37	168	68	24.093	0.95699	0.96609	0.96154	2	0	2	1
2	52	155	68	28.3039	0.90178	0.89234	0.89706	0	2	2	0
2	56	149	57	25.6745	0.91635	0.93439	0.92537	1	0	1	1
2	52	158	60	24.0346	1.00284	0.99716	1	2	0	2	1
2	45	168	64	22.6757	0.94741	0.93495	0.94118	1	1	2	0.5
2	43	163	66	24.841	1.01175	1.01811	1.01493	1	1	2	0.5
2	53	160	61	23.8281	0.93601	0.95287	0.94444	1	1	2	0.5
2	59	150	48	21.3333	0.96388	0.97898	0.97143	1	0	1	1
2	57	157	71	28.8044	0.96629	0.95037	0.95833	2	0	2	1
2	57	164	72	26.7698	0.87322	0.89148	0.88235	1	1	2	0.5
2	48	156	63	25.8876	0.91841	0.91493	0.91667	1	1	2	0.5
2	50	153	56	23.9224	0.9619	0.94436	0.95313	2	0	2	1
2	44	151	66	28.9461	0.92119	0.92955	0.92537	1	1	2	0.5
2	51	157	60	24.3418	0.94409	0.92893	0.93651	0	3	3	0
2	58	158	65	26.0375	0.97937	0.99247	0.98592	0	2	2	0
2	43	160	57	22.2656	0.93115	0.91501	0.92308	2	0	2	1
2	49	159	69	27.2932	0.92945	0.93897	0.93421	1	1	2	0.5
2	55	160	68	26.5625	0.93367	0.94693	0.9403	0	2	2	0
2	49	163	57	21.4536	0.92274	0.9344	0.92857	1	1	2	0.5
2	59	150	55	24.4444	0.92697	0.90865	0.91781	1	2	3	0.333333
2	36	156	74	30.4076	0.97594	0.96692	0.97143	0	1	1	0
2	51	153	56	23.9224	0.97676	0.99248	0.98462	1	2	3	0.333333
2	53	167	73	26.1752	0.9014	0.89348	0.89744	1	1	2	0.5
2	51	155	59	24.5578	0.92449	0.93467	0.92958	1	1	2	0.5
2	34	163	59	22.2063	0.93379	0.95193	0.94286	1	0	1	1
2	48	155	54	22.4766	0.91711	0.93363	0.92537	1	0	1	1
2	55	160	60	23.4375	0.96026	0.9608	0.96053	0	2	2	0
2	55	153	57	24.3496	0.88567	0.89811	0.89189	1	0	1	1
2	43	153	61	26.0584	0.94349	0.95815	0.95082	2	0	2	1
2	49	155	60	24.974	0.96243	0.97697	0.9697	1	1	2	0.5
2	31	167	60	21.5139	0.97701	0.96743	0.97222	1	1	2	0.5
2	50	158	60	24.0346	0.96258	0.98028	0.97143	1	1	2	0.5
2	55	157	90	36.5126	0.93891	0.95299	0.94595	2	1	3	0.666667
2	40	165	62	22.7732	0.94798	0.94536	0.94667	1	0	1	1
2	47	150	58	25.7778	0.92493	0.92801	0.92647	1	1	2	0.5
2	51	154	44	18.5529	0.98214	0.98888	0.98551	2	0	2	1
2	47	155	63	26.2227	0.97462	0.96568	0.97015	0	2	2	0
2	55	149	49	22.0711	0.9334	0.95066	0.94203	2	0	2	1
2	43	158	49	19.6283	0.93675	0.94731	0.94203	1	2	3	0.333333
2	51	153	56	23.9224	0.9487	0.93366	0.94118	1	1	2	0.5
2	38	168	65	23.03	0.89096	0.90614	0.89855	2	0	2	1
2	58	151	63	27.6304	0.9397	0.92696	0.93333	1	2	3	0.333333
2	47	158	54	21.6311	0.97879	0.96239	0.97059	1	0	1	1
2	42	161	58	22.3757	0.97715	0.96571	0.97143	0	1	1	0
2	52	150	47	20.8889	0.94464	0.93036	0.9375	2	0	2	1
2	56	164	61	22.68	0.97925	0.96595	0.9726	1	1	2	0.5
2	54	154	56	23.6128	0.96603	0.97841	0.97222	1	1	2	0.5
2	37	162	67	25.5296	0.96241	0.97699	0.9697	0	1	1	0
2	50	154	57	24.0344	0.94154	0.92688	0.93421	1	1	2	0.5
2	35	162	55	20.9572	0.8834	0.89742	0.89041	3	0	3	1
2	52	163	64	24.0882	0.95035	0.95875	0.95455	1	1	2	0.5
2	46	153	72	30.7574	0.97721	0.99381	0.98551	2	0	2	1
2	36	158	48	19.2277	0.97724	0.96306	0.97015	2	1	3	0.666667
2	53	160	61	23.8281	0.96145	0.98057	0.97101	2	0	2	1
2	59	157	61	24.7475	0.96506	0.97696	0.97101	1	2	3	0.333333
2	53	157	55	22.3133	0.94154	0.92688	0.93421	1	1	2	0.5
2	45	161	62	23.9188	1.00825	0.99175	1	2	1	3	0.666667
2	56	156	53	21.7784	0.96097	0.94379	0.95238	2	0	2	1
2	50	155	54	22.4766	0.90753	0.90069	0.90411	1	1	2	0.5
2	40	167	50	17.9282	0.94824	0.96604	0.95714	2	0	2	1
2	56	157	65	26.3702	0.96125	0.97525	0.96825	1	1	2	0.5
2	57	153	58	24.7768	0.9778	0.9674	0.9726	1	1	2	0.5
2	45	152	52.7	22.8099	0.95024	0.9602	0.95522	1	1	2	0.5
2	52	150	70	31.1111	0.93554	0.91954	0.92754	1	0	1	1
2	57	163	63	23.7118	0.96423	0.94881	0.95652	1	1	2	0.5
2	48	158	56	22.4323	0.90906	0.91446	0.91176	1	1	2	0.5
2	52	157	48	19.4734	0.97906	0.96124	0.97015	0	2	2	0
2	53	164	68	25.2826	0.88738	0.89928	0.89333	1	1	2	0.5
2	40	162	67	25.5296	0.96842	0.9505	0.95946	1	0	1	1
2	41	167	70	25.0995	0.96115	0.94795	0.95455	1	1	2	0.5
2	43	160	70	27.3437	0.96324	0.97616	0.9697	0	1	1	0
2	42	166	56	20.3223	0.96422	0.95128	0.95775	1	0	1	1
2	45	155	51	21.2279	0.93747	0.94131	0.93939	2	0	2	1
2	42	147	63	29.1545	0.94566	0.96204	0.95385	1	0	1	1
2	51	150	63	28	0.79797	0.78343	0.7907	2	1	3	0.666667
2	30	166	96	34.8381	0.92756	0.9391	0.93333	1	0	1	1
2	52	157	48	19.4734	1.03036	1.0363	1.03333	1	1	2	0.5
2	49	162	68	25.9107	0.93891	0.95299	0.94595	2	0	2	1
2	45	155	43	17.898	1.04047	1.02405	1.03226	0	1	1	0
2	55	162	52	19.8141	0.97966	0.96478	0.97222	2	0	2	1
2	48	164	57	21.1927	0.97438	0.97082	0.9726	1	1	2	0.5
2	52	161	63	24.3046	0.92082	0.93632	0.92857	2	0	2	1
2	41	157	67	27.1816	0.96444	0.94732	0.95588	1	0	1	1
2	59	155	52	21.6441	1.04023	1.02327	1.03175	1	0	1	1
2	53	159	62	24.5243	0.95327	0.94147	0.94737	1	0	1	1
2	43	158	60	24.0346	0.94821	0.93415	0.94118	1	0	1	1
2	55	155	55	22.8928	0.92011	0.92605	0.92308	1	1	2	0.5
2	48	170	70	24.2215	0.96621	0.97823	0.97222	1	0	1	1
2	49	159	70	27.6888	0.94962	0.93444	0.94203	2	0	2	1
2	39	163	54	20.3244	0.95846	0.9478	0.95313	0	1	1	0
2	55	160	56	21.875	0.89684	0.90872	0.90278	1	1	2	0.5
2	53	164	68	25.2826	0.99157	0.97669	0.98413	2	0	2	1
2	47	159	59	23.3377	0.94832	0.93574	0.94203	2	0	2	1
2	57	158	52	20.83	0.94509	0.96261	0.95385	1	1	2	0.5
2	53	152	55	23.8054	0.89448	0.90262	0.89855	1	1	2	0.5
2	58	164	48	17.8465	0.93576	0.95312	0.94444	1	2	3	0.333333
2	47	163	55	20.7008	0.95089	0.96577	0.95833	1	1	2	0.5
2	36	163	57	21.4536	0.96645	0.97949	0.97297	0	1	1	0
2	50	160	63	24.6094	0.96067	0.97779	0.96923	1	0	1	1
2	41	168	60	21.2585	0.97722	0.9938	0.98551	2	1	3	0.666667
2	58	158	59	23.634	0.93879	0.95311	0.94595	1	1	2	0.5
2	45	164	77	28.6288	0.94657	0.93221	0.93939	1	0	1	1
2	51	159	57	22.5466	0.97814	0.96216	0.97015	1	1	2	0.5
2	55	161	58	22.3757	0.93746	0.95296	0.94521	1	1	2	0.5
2	48	165	80	29.3848	0.96379	0.97561	0.9697	1	1	2	0.5
2	59	152	56	24.2382	1.00624	1.02362	1.01493	0	3	3	0
2	45	164	68	25.2826	0.93289	0.91327	0.92308	1	2	3	0.333333
2	45	159	68	26.8977	0.96385	0.97733	0.97059	1	1	2	0.5
2	51	157	52	21.0962	0.96263	0.98023	0.97143	0	2	2	0
2	58	157	60	24.3418	0.94801	0.92891	0.93846	2	1	3	0.666667
2	43	170	60	20.7612	0.96514	0.97516	0.97015	1	1	2	0.5
2	47	156	68	27.9421	0.93417	0.94989	0.94203	0	2	2	0
2	55	153	57	24.3496	0.97118	0.96728	0.96923	1	2	3	0.333333
2	43	158	56	22.4323	0.93441	0.93401	0.93421	1	2	3	0.333333
2	33	158	52	20.83	0.89817	0.91433	0.90625	1	0	1	1
2	43	158	70	28.0404	0.97494	0.96446	0.9697	0	1	1	0
2	57	158	74	29.6427	0.91546	0.91312	0.91429	2	1	3	0.666667
2	54	152	70	30.2978	0.99304	0.9747	0.98387	1	0	1	1
2	47	153	62	26.4855	0.96155	0.97785	0.9697	2	0	2	1
2	44	155	45	18.7305	0.97809	0.96927	0.97368	1	1	2	0.5
2	52	167	70	25.0995	0.91292	0.92708	0.92	1	1	2	0.5
2	39	163	54	20.3244	0.9505	0.9586	0.95455	1	2	3	0.333333
2	51	157	67	27.1816	0.93764	0.95278	0.94521	0	2	2	0
2	53	156	61	25.0657	0.91628	0.9147	0.91549	1	2	3	0.333333
2	44	150	63	28	0.96545	0.94883	0.95714	1	0	1	1
2	58	153	61	26.0584	0.97908	0.96378	0.97143	1	1	2	0.5
2	38	160	51	19.9219	0.96482	0.95624	0.96053	1	1	2	0.5
2	42	155	45	18.7305	0.97043	0.97243	0.97143	2	2	4	0.5
2	54	156	56	23.0112	0.96899	0.98223	0.97561	1	0	1	1
2	51	155	57	23.7253	0.96894	0.98228	0.97561	1	1	2	0.5
2	57	158	52	20.83	0.93367	0.91927	0.92647	1	1	2	0.5
2	45	179	58	18.1018	0.9702	0.9701	0.97015	1	1	2	0.5
2	43	154	54	22.7694	0.97806	0.9907	0.98438	0	1	1	0
2	41	158	70	28.0404	1.01881	1.01293	1.01587	0	2	2	0
2	40	162	82	31.2452	0.99851	1.00149	1	1	1	2	0.5
2	51	153	49	20.9321	1.11748	1.12868	1.12308	0	2	2	0
2	41	165	54	19.8347	0.94331	0.96145	0.95238	1	0	1	1
2	57	162	55	20.9572	0.91902	0.93606	0.92754	0	2	2	0
2	51	160	64	25	0.92182	0.93532	0.92857	2	0	2	1
2	55	155	57.5	23.9334	0.94819	0.93241	0.9403	1	0	1	1
2	51	158	62	24.8358	0.93938	0.92728	0.93333	2	0	2	1
2	35	169	61	21.3578	0.98124	0.98752	0.98438	0	1	1	0
2	47	168	57	20.1956	0.96903	0.97541	0.97222	0	2	2	0
2	56	163	65	24.4646	0.96514	0.97516	0.97015	2	0	2	1
2	53	153	70	29.903	0.9224	0.93474	0.92857	1	1	2	0.5
2	59	152	52	22.5069	0.91558	0.92818	0.92188	2	0	2	1
2	48	162	53	20.1951	0.9684	0.9516	0.96	1	0	1	1
2	49	158	75	30.0433	0.99169	0.97755	0.98462	1	1	2	0.5
2	49	155	48	19.9792	0.95335	0.93553	0.94444	1	1	2	0.5
2	58	163	55	20.7008	0.97489	0.99435	0.98462	1	0	1	1
2	47	153	48	20.5049	0.92786	0.94714	0.9375	2	0	2	1
2	53	152	50	21.6413	0.96516	0.9777	0.97143	1	0	1	1
2	42	155	56	23.3091	0.96115	0.94795	0.95455	1	1	2	0.5
2	54	156	56	23.0112	0.92464	0.92152	0.92308	0	1	1	0
2	56	153	51	21.7865	0.99054	1.00946	1	1	1	2	0.5
2	51	158	82.2	32.9274	0.97985	0.96301	0.97143	1	2	3	0.333333
